# Supplementary material for: Comparative Transcriptomic and Epigenomic Analysis Highlights Hepatitis B Virus Infection Impact on Hepatocellular Carcinoma Development
Source: Research Square preprint supplement (doi:10.21203/rs.3.rs-7850229/v1), 2025-10-21
Supplement: Supplementary file 1 [file 77b2108f6eae9ff997c9005d.docx]

Supplementary Table 1 (this is a screenshot, but real table will be submitted)


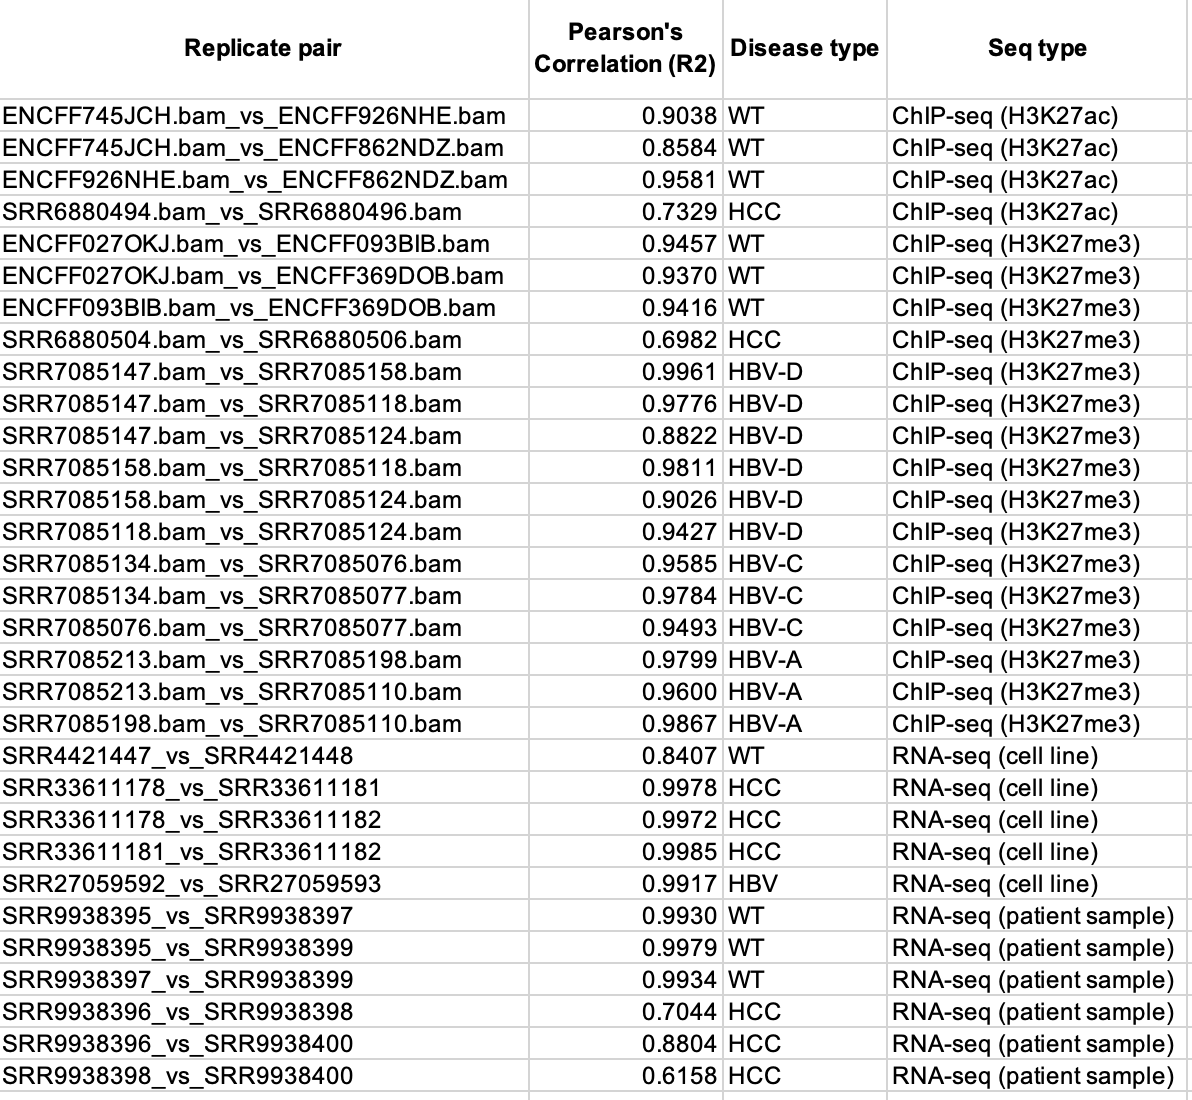


Supplemental figure 1


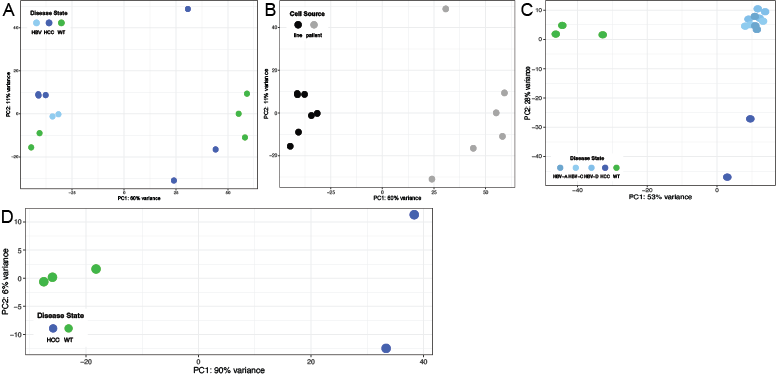


**Supplemental Figure 1.** **Principle Component Analysis of sample replicates.** (A) Comparing RNA-seq data for disease states (WT, HBV, and HCC). (B) Comparing RNA-seq data for cell line vs. patient-derived data. C) Comparing H3K27me3 ChIP-seq data for disease states (WT, HBV, and HCC) (D) Comparing H3K27ac ChIP-seq data for disease states (WT and HCC).

Supplemental figure 2


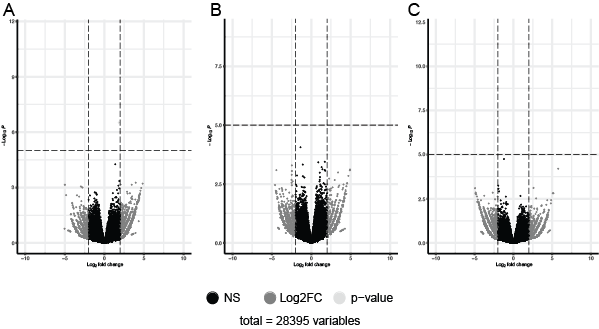


**Supplemental Figure 2.** **Volcano plots of differential H3K27me3 in HBV genotypes.** Differential H3K27me3 presence in HBV-D vs. HBV-C (A), HBV-D vs. HBV-A (B), and HBV-C vs. HBV-A (C).
